# Supplementary material for: How many electrons to stabilize the icosahedral Cu55 core in ligated nanoclusters? The example of [Cu55(NHC)6]
Source: Royal Society of Chemistry journal article supplement (doi:10.1039/d5nr01400j), 2025-01-01
Supplement: d5nr01400j2.pdf [file d5nr01400j2.pdf]

## Supplementary information

### **How many electrons to stabilize the icosahedral Cu<sub>55</sub> core in ligated nanoclusters? The example of [Cu<sub>55</sub>(NHC)<sub>6</sub>]**

Mohamed Amine Zerizer, Christian Kleeberg, Bachir Zouchoune and Jean-Yves Saillard

---

**Table S1.** Selected metrical data for the open-shell neutral  $[\text{Cu}_{55}(\text{NHC}^{\text{B}})_6]$  (55 electrons) and thiolate-protected  $[\text{Cu}_{55}(\text{SH})_6]^-$  (50 electrons) models. All distances (in Å) are averaged to  $I_h$  symmetry.

|                            | $[\text{Cu}_{55}(\text{NHC}^{\text{B}})_6]$ | $[\text{Cu}_{55}(\text{SH})_6]^-$ |
|----------------------------|---------------------------------------------|-----------------------------------|
| Superatomic electron count | 55                                          | 50                                |
| Symmetry                   | $T_h$                                       | $T_h$                             |
| 1G splitting/occupation    | $t_g^6 e_g^4 t_g^5$                         | $t_g^6 e_g^4 t_g^0$               |
| HOMO-LUMO gap (eV)         | -                                           | 2.06                              |
| Cu(1)-Cu(2)                | 2.433                                       | 2.440                             |
| Cu(2)-Cu(2)                | 2.572                                       | 2.561                             |
| Cu(2)-Cu(3)                | 2.555                                       | 2.520                             |
| Cu(2)-Cu(4)                | 2.409                                       | 2.454                             |
| Cu(3)-Cu(3)                | 2.642                                       | 2.630                             |
| Cu(3)-Cu(4)                | 2.578                                       | 2.574                             |
| Cu-C/Cu-S                  | 1.979                                       | 2.232                             |
| Cu...C                     | 2.885                                       | -                                 |

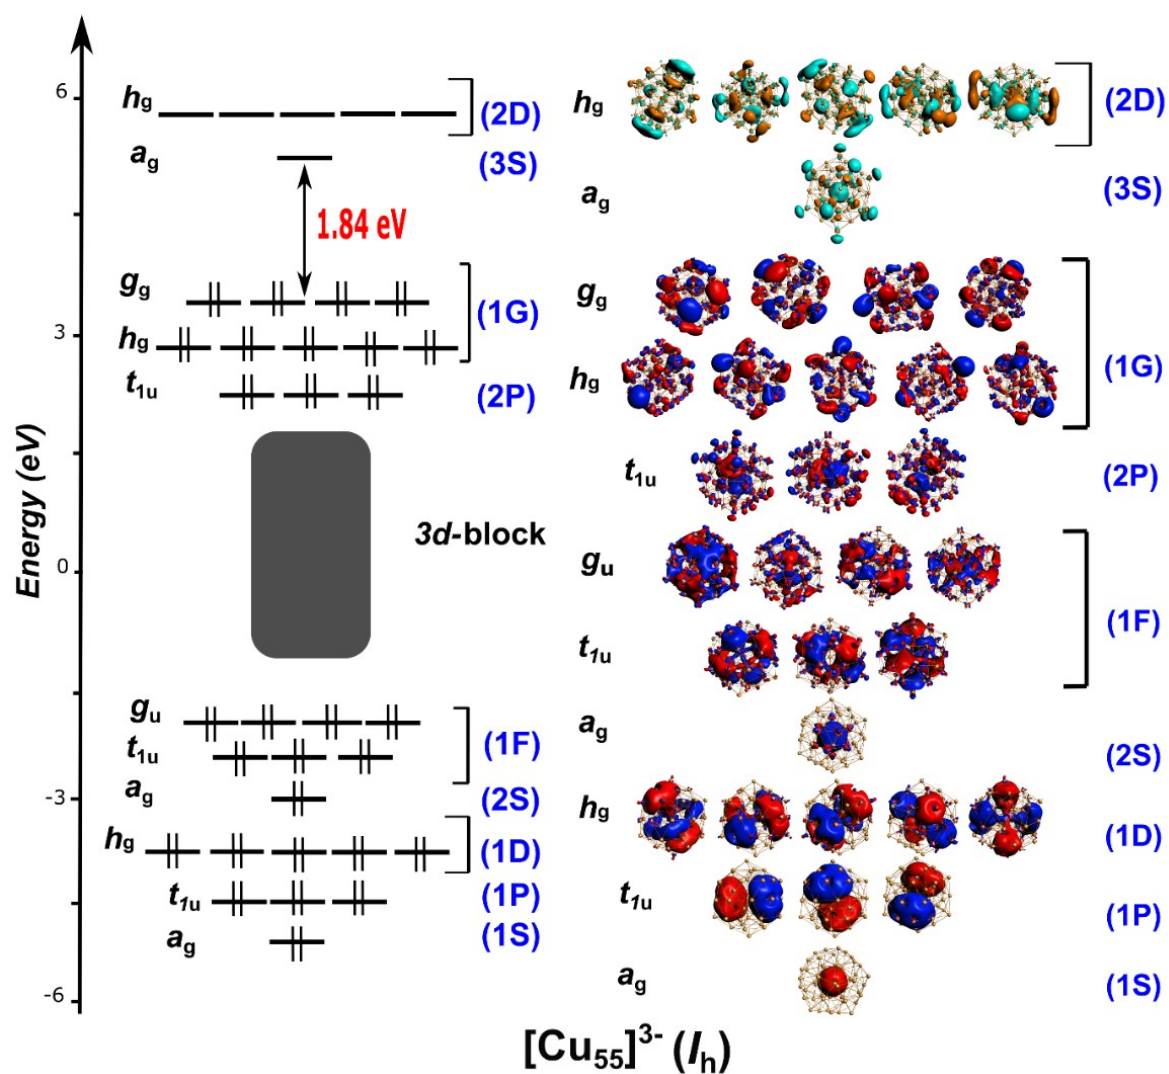

**Figure S1.** Kohn-Sham orbital level ordering of the hypothetical 58-electron  $[\text{Cu}_{55}]^{3-}$  cluster. The superatomic orbitals are plotted on the right side.

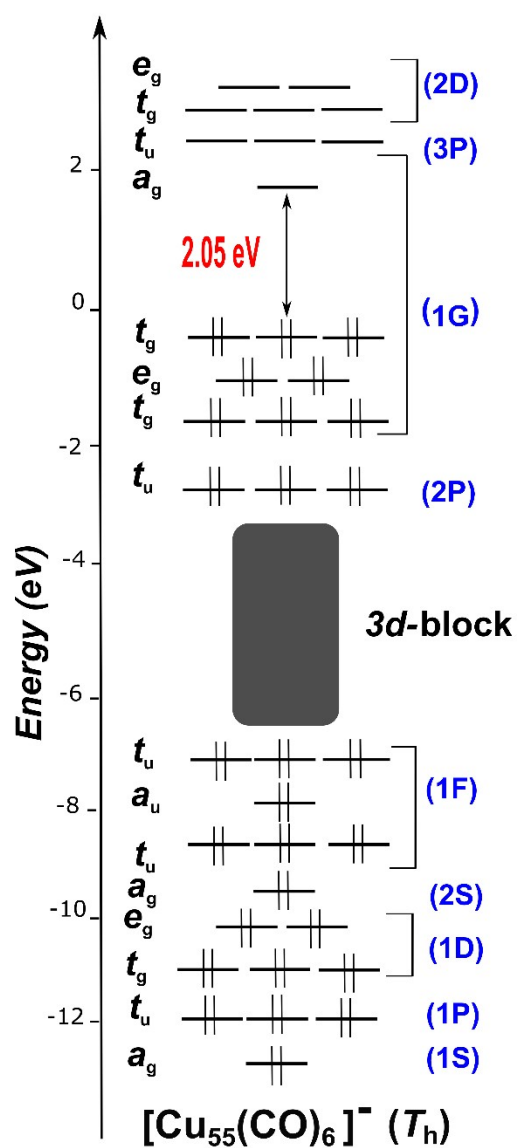

**Figure S2.** Kohn-Sham orbital diagram of the 56-electron  $[\text{Cu}_{55}(\text{CO})_6]^-$  model cluster.

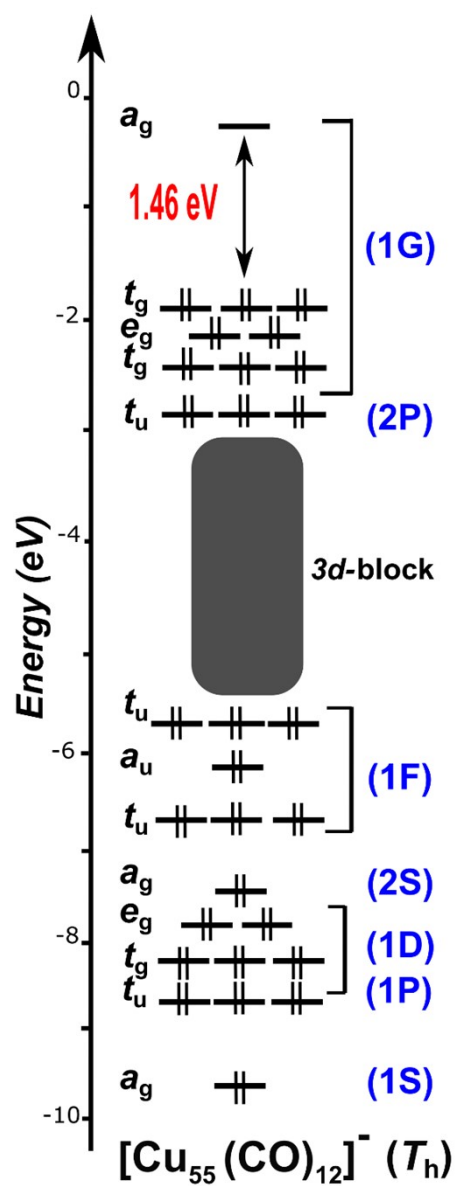

**Figure S3.** Kohn-Sham orbital diagram of the 56-electron  $[\text{Cu}_{55}(\text{CO})_{12}]^-$  model cluster.
